# Supplementary material for: Rnf32 is not essential for spermatogenesis and male fertility in mice
Source: PeerJ. 2025 Jul 30;13:e19794. doi: 10.7717/peerj.19794 (PMC12317687; doi:10.7717/peerj.19794)
Supplement: Supplemental Information 2 [file peerj-13-19794-s002.xlsx]

## Sheet: F1 A
	Sample Name	Target Name	CT
	heart	18s	10.5275
	heart	18s	10.4377
	heart	18s	10.3348
	heart	RNF32	27.3892
	heart	RNF32	27.2821
	heart	RNF32	27.2855
	liver	18s	9.92337
	liver	18s	9.96999
	liver	18s	9.9722
	liver	RNF32	28.5792
	liver	RNF32	28.572
	liver	RNF32	28.3934
	spleen	18s	8.8819
	spleen	18s	8.77177
	spleen	18s	8.66191
	spleen	RNF32	27.7701
	spleen	RNF32	27.7369
	spleen	RNF32	27.6595
	lung	18s	9.21086
	lung	18s	9.13132
	lung	18s	9.17935
	lung	RNF32	22.2311
	lung	RNF32	22.2436
	lung	RNF32	22.2355
	kidney	18s	9.56684
	kidney	18s	9.44862
	kidney	18s	9.45557
	kidney	RNF32	25.6736
	kidney	RNF32	25.6982
	kidney	RNF32	25.6651
	brain	18s	10.0267
	brain	18s	10.034
	brain	18s	10.0434
	brain	RNF32	23.8348
	brain	RNF32	23.8223
	brain	RNF32	23.9824
	fat	18s	10.3443
	fat	18s	10.2122
	fat	18s	10.2773
	fat	RNF32	24.4011
	fat	RNF32	24.3781
	fat	RNF32	24.4852
	muscle	18s	9.55812
	muscle	18s	9.93445
	muscle	18s	8.97392
	muscle	RNF32	25.8978
	muscle	RNF32	25.8883
	muscle	RNF32	25.8123

## Sheet: F1 B
	Sample Name	Target Name	CT
	1W	18s	11.2427
	1W	18s	10.9908
	1W	18s	11.0066
	1W	RNF32	25.3606
	1W	RNF32	25.418
	1W	RNF32	25.2842
	2W	18s	11.239
	2W	18s	11.0932
	2W	18s	11.2553
	2W	RNF32	21.6661
	2W	RNF32	21.7799
	2W	RNF32	21.7472
	3W	18s	11.5858
	3W	18s	11.3634
	3W	18s	11.4435
	3W	RNF32	17.3032
	3W	RNF32	17.3239
	3W	RNF32	17.3549
	4W	18s	11.4981
	4W	18s	11.4863
	4W	18s	11.5189
	4W	RNF32	17.1054
	4W	RNF32	17.1623
	4W	RNF32	17.097
	5W	18s	12.2619
	5W	18s	12.2668
	5W	18s	12.2043
	5W	RNF32	17.6634
	5W	RNF32	17.697
	5W	RNF32	17.6659
	6W	18s	11.5014
	6W	18s	11.5206
	6W	18s	11.5814
	6W	RNF32	17.2255
	6W	RNF32	17.2438
	6W	RNF32	17.2727
	7W	18s	11.6436
	7W	18s	11.5272
	7W	18s	11.5884
	7W	RNF32	17.3553
	7W	RNF32	17.3731
	7W	RNF32	17.4095
	8W	18s	11.3241
	8W	18s	11.4347
	8W	18s	11.5245
	8W	RNF32	17.2881
	8W	RNF32	17.4241
	8W	RNF32	17.4384

## Sheet: F1 E
	Sample Name	Target Name	CT
	wt	18s	11.2455
	wt	18s	11.2227
	wt	18s	11.3342
	wt	RNF32	24.4342
	wt	RNF32	24.4351
	wt	RNF32	24.4798
	homo	18s	10.1077
	homo	18s	10.0714
	homo	18s	10.0951
	homo	RNF32	25.6672
	homo	RNF32	25.4765
	homo	RNF32	25.6034
