# Supplementary material for: Rnf32 is not essential for spermatogenesis and male fertility in mice
Source: PeerJ. 2025 Jul 30;13:e19794. doi: 10.7717/peerj.19794 (PMC12317687; doi:10.7717/peerj.19794)
Supplement: Supplemental Information 5 [file peerj-13-19794-s005.xlsx]

## Sheet: Figure 1
Figure 1
Figure 1A
Relative mRNA levels of RNF32
	Biological Replicate 1	Biological Replicate 2	Biological Replicate 3
heart	0.00118893	0.00109193	0.00107669
liver	0.000342822	0.000322928	0.000388544
spleen	0.000291828	0.000251068	0.000260563
lung	0.0170426	0.0145104	0.0160135
Kidney	0.00200644	0.00164911	0.00179975
Fat	0.00830798	0.00699041	0.0072073
Muscle	0.00170731	0.00202436	0.0011639
Brain	0.00987164	0.00908209	0.00868398
Testis	1	1	1
Figure 1B
Relative mRNA levels of RNF32 in mouse testis
	Biological Replicate 1	Biological Replicate 2	Biological Replicate 3
1w	0.00237736	0.00195708	0.00221887
2w	0.0306991	0.0261601	0.0306017
3w	0.803348	0.692394	0.732123
4w	0.867037	0.843307	0.922449
5w	1	1	1
6w	0.799604	0.816196	0.852779
7w	0.806535	0.749624	0.779433
8w	0.677094	0.678674	0.730874
Figure 1E
Relative mRNA levels normalized to 18S
	Biological Replicate 1	Biological Replicate 2	Biological Replicate 3
RNF32+/+	1	1	1
RNF32-/-	0.193334	0.21874	0.19442

## Sheet: Figure 2
Figure 2
Figure 2A
Body Weight (g)
	Biological Replicate 1	Biological Replicate 2	Biological Replicate 3
RNF32+/+	29.65	29.04	28.52
RNF32-/-	27.02	26.3	26.68
Figure 2B
Testis Weight (mg)
	Biological Replicate 1	Biological Replicate 2	Biological Replicate 3
RNF32+/+	100	95	92
RNF32-/-	95	93	88
Figure 2C
Testis/Body Weight (mg/g)
	Biological Replicate 1	Biological Replicate 2	Biological Replicate 3
RNF32+/+	3.37268	3.27135	3.22581
RNF32-/-	3.51591	3.53612	3.29835
Figure 2E
Pups per litter
	Biological Replicate 1	Biological Replicate 2	Biological Replicate 3
RNF32+/+	6	7	9
RNF32-/-	7	6	10

## Sheet: Figure 4
Figure 4
Figure 4C
Sperm count (x 10^6 per ml)
	Biological Replicate 1	Biological Replicate 2	Biological Replicate 3
RNF32+/+	36.53	29.81	26.61
RNF32-/-	35.09	40.5	32.03
Figure 4D
Sperm motile (%)
	Biological Replicate 1	Biological Replicate 2	Biological Replicate 3
RNF32+/+	85.4	65.7	67.5
RNF32-/-	67.9	76	74.5
Figure 4E
Sperm progressive (%)
	Biological Replicate 1	Biological Replicate 2	Biological Replicate 3
RNF32+/+	19.3	26.8	32.5
RNF32-/-	25.6	28.2	26.1

## Sheet: Figure S1
Figure S1
Figure S1 A
PNA/Tubule
	Biological Replicate 1	Biological Replicate 2	Biological Replicate 3
RNF32+/+	108	82	80
RNF32-/-	90	102	118
Figure S1 B
SOX9/Tubule
	Biological Replicate 1	Biological Replicate 2	Biological Replicate 3
RNF32+/+	17	17	16
RNF32-/-	14	14	16
Figure S1 C
Tunel positive Tubule/Total Tubule
	Biological Replicate 1	Biological Replicate 2	Biological Replicate 3
RNF32+/+	0.166667	0.171946	0.178295
RNF32-/-	0.17094	0.179283	0.165493
Figure S1 D
Tunel positive cells/Total Tubule
	Biological Replicate 1	Biological Replicate 2	Biological Replicate 3
RNF32+/+	0.34058	0.371041	0.418605
RNF32-/-	0.397436	0.494024	0.383803
Figure S1 E
Abnormal sperm ratio
	Biological Replicate 1	Biological Replicate 2	Biological Replicate 3
RNF32+/+	0.181818	0.222222	0.25
RNF32-/-	0.217391	0.21875	0.232558
