# Supplementary material for: Rnf32 is not essential for spermatogenesis and male fertility in mice
Source: PeerJ. 2025 Jul 30;13:e19794. doi: 10.7717/peerj.19794 (PMC12317687; doi:10.7717/peerj.19794)
Supplement: Supplemental Information 8 [file peerj-13-19794-s008.xls]

## Sheet: Sheet1
ITEM TO CHECK	IMPORTANCE	CHECKLIST
EXPERIMENTAL DESIGN
Definition of experimental and control groups	E	Line 105
Number within each group	E	Line 105
Assay carried out by core lab or investigator's lab?	D	NA
Acknowledgement of authors' contributions	D	Line 295-302
SAMPLE
Description	E	Line 78-168
Volume/mass of sample processed	D	Line 78-168
Microdissection or macrodissection	E	Line 78-168
Processing procedure	E	NA
If frozen - how and how quickly?	E	NA
If fixed - with what, how quickly?	E	Line 132-138
Sample storage conditions and duration (especially for FFPE samples)	E	NA
NUCLEIC ACID EXTRACTION
Procedure and/or instrumentation	E	Line 78-174
Name of kit and details of any modifications	E	Line 78-174
Source of additional reagents used	D	NA
Details of DNase or RNAse treatment	E	Line 105-120
Contamination assessment (DNA or RNA)	E	Line 105-120
Nucleic acid quantification	E	Line 105-120
Instrument and method	E	Line 105-120
Purity (A260/A280)	D	Line 105-120
Yield	D	Line 105-120
RNA integrity method/instrument	E	NA
RIN/RQI or Cq of 3' and 5' transcripts	E	NA
Electrophoresis traces	D	NA
Inhibition testing (Cq dilutions, spike or other)	E	NA
REVERSE TRANSCRIPTION
Complete reaction conditions	E	Line 105-120
Amount of RNA and reaction volume	E	Line 105-120
Priming oligonucleotide (if using GSP) and concentration	E	Line 105-120
Reverse transcriptase and concentration	E	Line 105-120
Temperature and time	E	Line 105-120
Manufacturer of reagents and catalogue numbers	D	Line 105-120
Cqs with and without RT	D*	NA
Storage conditions of cDNA	D	NA
qPCR TARGET INFORMATION
If multiplex, efficiency and LOD of each assay.	E	NA
Sequence accession number	E	NA
Location of amplicon	D	NA
Amplicon length	E	Line 114-116
In silico specificity screen (BLAST, etc)	E	NA
Pseudogenes, retropseudogenes or other homologs?	D	NA
Sequence alignment	D	NA
Secondary structure analysis of amplicon	D	NA
Location of each primer by exon or intron (if applicable)	E	NA
What splice variants are targeted?	E	NA
qPCR OLIGONUCLEOTIDES
Primer sequences	E	Line 118
RTPrimerDB Identification Number	D	NA
Probe sequences	D**	NA
Location and identity of any modifications	E	NA
Manufacturer of oligonucleotides	D	NA
Purification method	D	NA
qPCR PROTOCOL
Complete reaction conditions	E	Line 105-120
Reaction volume and amount of cDNA/DNA	E	Line 105-120
Primer, (probe), Mg++ and dNTP concentrations	E	Line 105-120
Polymerase identity and concentration	E	Line 105-120
Buffer/kit identity and manufacturer	E	Line 105-120
Exact chemical constitution of the buffer	D	NA
Additives (SYBR Green I, DMSO, etc.)	E	Line 105-120
Manufacturer of plates/tubes and catalog number	D	NA
Complete thermocycling parameters	E	Line 105-120
Reaction setup (manual/robotic)	D	NA
Manufacturer of qPCR instrument	E	Line 105-120
qPCR VALIDATION
Evidence of optimisation (from gradients)	D	NA
Specificity (gel, sequence, melt, or digest)	E	NA
For SYBR Green I, Cq of the NTC	E	NA
Standard curves with slope and y-intercept	E	NA
PCR efficiency calculated from slope	E	NA
Confidence interval for PCR efficiency or standard error	D	NA
r2 of standard curve	E	NA
Linear dynamic range	E	NA
Cq variation at lower limit	E	NA
Confidence intervals throughout range	D	NA
Evidence for limit of detection	E	NA
If multiplex, efficiency and LOD of each assay.	E	NA
DATA ANALYSIS
qPCR analysis program (source, version)	E	Line 170-174
Cq method determination	E	Line 170-174
Outlier identification and disposition	E	Line 170-174
Results of NTCs	E	Line 170-174
Justification of number and choice of reference genes	E	Line 170-174
Description of normalisation method	E	Line 170-174
Number and concordance of biological replicates	D	NA
Number and stage (RT or qPCR) of technical replicates	E	Line 170-174
Repeatability (intra-assay variation)	E	Line 170-174
Reproducibility (inter-assay variation, %CV)	D	NA
Power analysis	D	NA
Statistical methods for result significance	E	Line 170-174
Software (source, version)	E	Line 170-174
Cq or raw data submission using RDML	D	NA
Table 1. MIQE checklist for authors, reviewers and editors. All essential information (E) must be submitted with the manuscript. Desirable
information (D) should be submitted if available. If using primers obtained from RTPrimerDB, information on qPCR target, oligonucleotides,
protocols and validation is available from that source.
*: Assessing the absence of DNA using a no RT assay is essential when first extracting RNA. Once the sample has been validated as
RDNA-free, inclusion of a no-RT control is desirable, but no longer essential.
**: Disclosure of the probe sequence is highly desirable and strongly encouraged. However, since not all commercial pre-designed assay
vendors provide this information, it cannot be an essential requirement. Use of such assays is advised against.
